# Supplementary material for: Robust dual physically cross-linked hydrogels with unique self-reinforcing behavior and improved dye adsorption capacity
Source: Royal Society of Chemistry journal article supplement (doi:10.1039/c5ra06361b), 2015-01-01
Supplement: c5ra06361b1.pdf [file c5ra06361b1.pdf]

## **Supplementary information**

# **Robust DualPhysically Cross-Linked Hydrogels with Unique Self-Reinforcing Behavior and Improved Dye Adsorption Capacity**

Wei Cui, Zi-Jing Zhang, Hang Li, Le-Min Zhu, Huan Liu and Rong Ran\*

College of Polymer Science and Engineering, State Key Laboratory of Polymer

Materials Engineering, Sichuan University, Chengdu, 610065,

People's Republic of China

\*Corresponding author. Email address: ranrong@scu.edu.cn

Tel:+86-28-85462890, Fax:+86-28-85462890

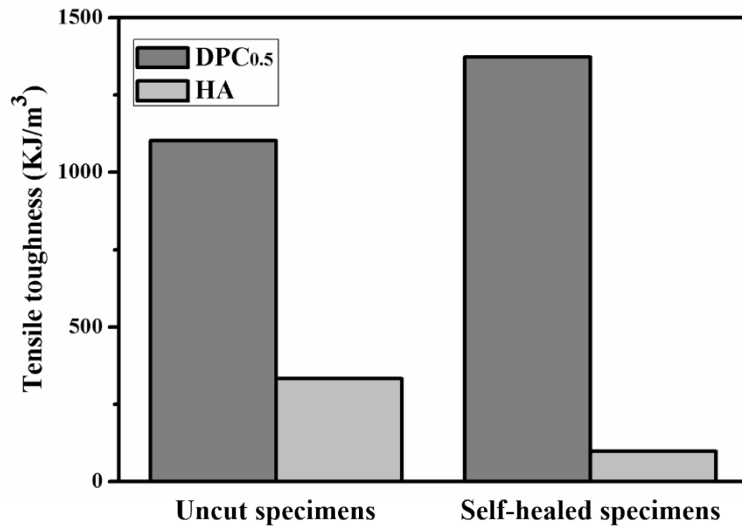

**Fig. S1** Tensile toughness of uncut specimens and self-healed specimens calculated from Fig. 5b.

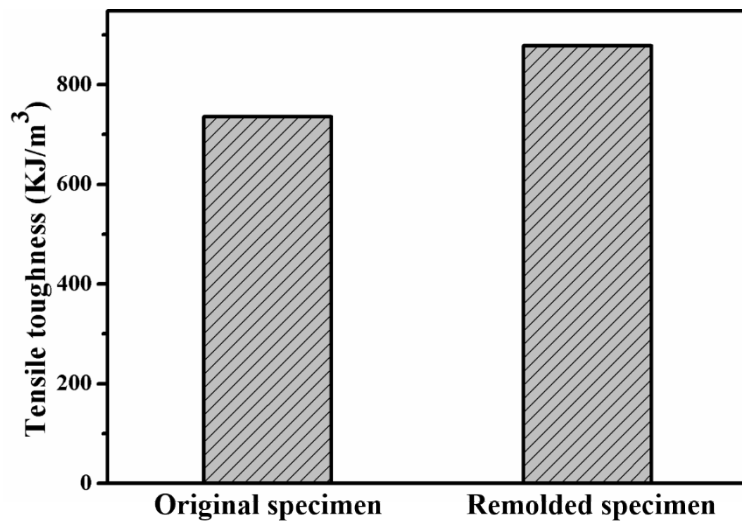

**Fig. S2** Tensile toughness of the original and remolded DPC<sub>1.5</sub> gel calculated from Fig. 6b.

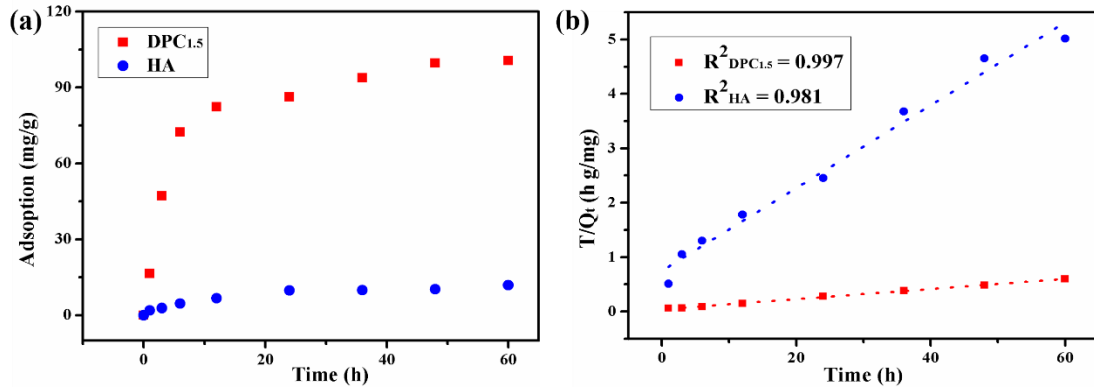

**Fig. S3** (a) Time-dependent adsorption of crystal violet (CV) on DPC<sub>1.5</sub> and HA gels.  
 (b) Pseudo-second-equation fitting for adsorption kinetics of DPC<sub>1.5</sub> and HA gels.

For pseudo-second order equation, the integrated form could be described below

$$T/Q_t = T/Q_{eq} + 1/k_2 Q_{eq}^2$$

where  $Q_{eq}$  and  $Q_t$  (mg/g) are the amounts of dye adsorbed at the equilibrium and time  $T$ , respectively,  $k_2$  is the pseudo-first-order rate constant.
